# Supplementary material for: Laboratory Culture and Life Cycle of Thelazia callipaeda in Intermediate and Definitive Hosts
Source: MDPI journal article supplement (doi:10.3390/pathogens11091066), 2022-09-19
Supplement: s1 [file s1]

## Supplementary Material

**Table S1.** *cox1* (199bp) with h1-h21 sequence identity matrix.

| ID                        | COX1  | h1    | h2    | h3    | h4    | h5    | h6    | h7    | h8    | h9    | h10   | h11   | h12   | h13   | h14 | h15 | h16 | h17 | h18 | h19 | h20 | h21 |
|---------------------------|-------|-------|-------|-------|-------|-------|-------|-------|-------|-------|-------|-------|-------|-------|-----|-----|-----|-----|-----|-----|-----|-----|
| COX1                      |       |       |       |       |       |       |       |       |       |       |       |       |       |       |     |     |     |     |     |     |     |     |
| AM042549.1 h1<br>(Europe) | 0.974 |       |       |       |       |       |       |       |       |       |       |       |       |       |     |     |     |     |     |     |     |     |
| AM042550.1 h2<br>(China)  | 0.989 | 0.964 |       |       |       |       |       |       |       |       |       |       |       |       |     |     |     |     |     |     |     |     |
| AM042551.1 h3<br>(China)  | 1     | 0.974 | 0.989 |       |       |       |       |       |       |       |       |       |       |       |     |     |     |     |     |     |     |     |
| AM042552.1 h4<br>(China)  | 0.984 | 0.979 | 0.974 | 0.984 |       |       |       |       |       |       |       |       |       |       |     |     |     |     |     |     |     |     |
| AM042553.1 h5<br>(korea)  | 0.994 | 0.969 | 0.984 | 0.994 | 0.979 |       |       |       |       |       |       |       |       |       |     |     |     |     |     |     |     |     |
| AM042554.1 h6<br>(korea)  | 0.989 | 0.964 | 0.979 | 0.989 | 0.974 | 0.984 |       |       |       |       |       |       |       |       |     |     |     |     |     |     |     |     |
| AM042555.1 h7<br>(korea)  | 1     | 0.974 | 0.989 | 1     | 0.984 | 0.994 | 0.989 |       |       |       |       |       |       |       |     |     |     |     |     |     |     |     |
| AM042556.1 h8<br>(korea)  | 0.989 | 0.964 | 0.979 | 0.989 | 0.974 | 0.984 | 0.989 | 0.989 |       |       |       |       |       |       |     |     |     |     |     |     |     |     |
| AB852543.1 h9 (korea)     | 0.994 | 0.969 | 0.984 | 0.994 | 0.979 | 1     | 0.984 | 0.994 | 0.984 |       |       |       |       |       |     |     |     |     |     |     |     |     |
| AB852550.1 h10<br>(korea) | 0.994 | 0.969 | 0.984 | 0.994 | 0.979 | 1     | 0.984 | 0.994 | 0.984 | 1     |       |       |       |       |     |     |     |     |     |     |     |     |
| AB852544.1 h11<br>(korea) | 0.974 | 0.949 | 0.964 | 0.974 | 0.959 | 0.969 | 0.964 | 0.974 | 0.964 | 0.969 | 0.969 |       |       |       |     |     |     |     |     |     |     |     |
| AB852545.1 h12<br>(korea) | 0.974 | 0.949 | 0.964 | 0.974 | 0.959 | 0.969 | 0.964 | 0.974 | 0.964 | 0.969 | 0.969 | 1     |       |       |     |     |     |     |     |     |     |     |
| MF795664.1 h13<br>(China) | 0.989 | 0.974 | 0.989 | 0.989 | 0.984 | 0.984 | 0.979 | 0.989 | 0.979 | 0.984 | 0.984 | 0.964 | 0.964 |       |     |     |     |     |     |     |     |     |
| MF795670.1 h14<br>(China) | 0.994 | 0.969 | 0.984 | 0.994 | 0.979 | 0.989 | 0.994 | 0.994 | 0.994 | 0.989 | 0.989 | 0.969 | 0.969 | 0.984 |     |     |     |     |     |     |     |     |

|                           |       |       |       |       |       |       |       |       |       |       |       |       |       |       |       |       |       |       |       |
|---------------------------|-------|-------|-------|-------|-------|-------|-------|-------|-------|-------|-------|-------|-------|-------|-------|-------|-------|-------|-------|
| MF795691.1 h15<br>(China) | 1     | 0.974 | 0.989 | 1     | 0.984 | 0.994 | 0.989 | 1     | 0.989 | 0.994 | 0.994 | 0.974 | 0.974 | 0.989 | 0.994 |       |       |       |       |
| MF795675.1 h16<br>(China) | 1     | 0.974 | 0.989 | 1     | 0.984 | 0.994 | 0.989 | 1     | 0.989 | 0.994 | 0.994 | 0.974 | 0.974 | 0.989 | 0.994 | 1     |       |       |       |
| MF795678.1 h17<br>(China) | 0.994 | 0.979 | 0.984 | 0.994 | 0.989 | 0.989 | 0.984 | 0.994 | 0.984 | 0.989 | 0.989 | 0.969 | 0.969 | 0.994 | 0.989 | 0.994 | 0.994 |       |       |
| MF795680.1 h18<br>(China) | 1     | 0.974 | 0.989 | 1     | 0.984 | 0.994 | 0.989 | 1     | 0.989 | 0.994 | 0.994 | 0.974 | 0.974 | 0.989 | 0.994 | 1     | 1     | 0.994 |       |
| MF795686.1 h19<br>(China) | 1     | 0.974 | 0.989 | 1     | 0.984 | 0.994 | 0.989 | 1     | 0.989 | 0.994 | 0.994 | 0.974 | 0.974 | 0.989 | 0.994 | 1     | 1     | 0.994 | 1     |
| MF795689.1 h20<br>(China) | 1     | 0.974 | 0.989 | 1     | 0.984 | 0.994 | 0.989 | 1     | 0.989 | 0.994 | 0.994 | 0.974 | 0.974 | 0.989 | 0.994 | 1     | 1     | 0.994 | 1 1   |
| MF795694.1 h21<br>(China) | 1     | 0.974 | 0.989 | 1     | 0.984 | 0.994 | 0.989 | 1     | 0.989 | 0.994 | 0.994 | 0.974 | 0.974 | 0.989 | 0.994 | 1     | 1     | 0.994 | 1 1 1 |

**Table S2.** Number and percentage of *Phortica okadai* (female-F/male-M, Live-L/Death-D) that were experimentally infected and found positive of *Thelazia callipaeda* at dissection on different days post-infection

| Days post-infection | Number of flies | Flies collected |        |       |        | Dissected flies positive for L3 |        |       |        |
|---------------------|-----------------|-----------------|--------|-------|--------|---------------------------------|--------|-------|--------|
|                     |                 | Live            |        | Death |        | Live                            |        | Death |        |
|                     |                 | Male            | Female | Male  | Female | Male                            | Female | Male  | Female |
| 18                  | 6               | 2               | 1      | 2     | 1      | 0                               | 0      | 0     | 1      |
| 20                  | 6               | 1               | 1      | 2     | 2      | 0                               | 0      | 2     | 0      |
| 22                  | 8               | 2               | 1      | 2     | 3      | 0                               | 0      | 1     | 1      |
| 24                  | 6               | 1               | 2      | 2     | 1      | 0                               | 0      | 1     | 0      |
| 26                  | 8               | 1               | 2      | 3     | 2      | 0                               | 0      | 2     | 0      |
| 28                  | 8               | 2               | 2      | 2     | 2      | 0                               | 0      | 2     | 0      |
| 30                  | 14              | 5               | 6      | 2     | 1      | 0                               | 0      | 1     | 0      |
| Total               | 56              | 14              | 15     | 15    | 12     | 0                               | 0      | 8     | 2      |
| Infection rate      |                 | 17.9%           |        |       |        |                                 |        |       |        |
